# Supplementary material for: Discrimination of Head and Neck Squamous Cell Carcinoma Patients and Healthy Adults by 10-Color Flow Cytometry: Development of a Score Based on Leukocyte Subsets
Source: MDPI journal article supplement (doi:10.3390/cancers11060814), 2019-06-12
Supplement: s1 [file s1]

Figure S1. **Gating strategy for the 10-color 13-antibody panel OMIP-023** using a sample of one subject. EDTA-anticoagulated whole blood was pre-lysed to remove CD45<sup>-</sup> erythrocytes and to enrich CD45<sup>+</sup> leukocytes. The stained peripheral blood sample was prepared for analysis by excluding air bubbles (time *versus* sideward scatter, plot 1) followed by gating on single-cell events (exclusion of non-single events outside the gate) in plot 2 (time of flight forward scatter *versus* forward scatter) before gating in plot 3 (CD45<sup>+</sup> leukocytes) on the three major subsets, granulocytes (A, SSC<sup>high</sup>), monocytes (B, SSC<sup>med</sup>) and lymphocytes (C, SSC<sup>low</sup>) for further analyses (see Figure S2; plot 3 shown here corresponds to plot 1 in Figure S2). Further details can be found in *Methods\** and in [15] and [16].

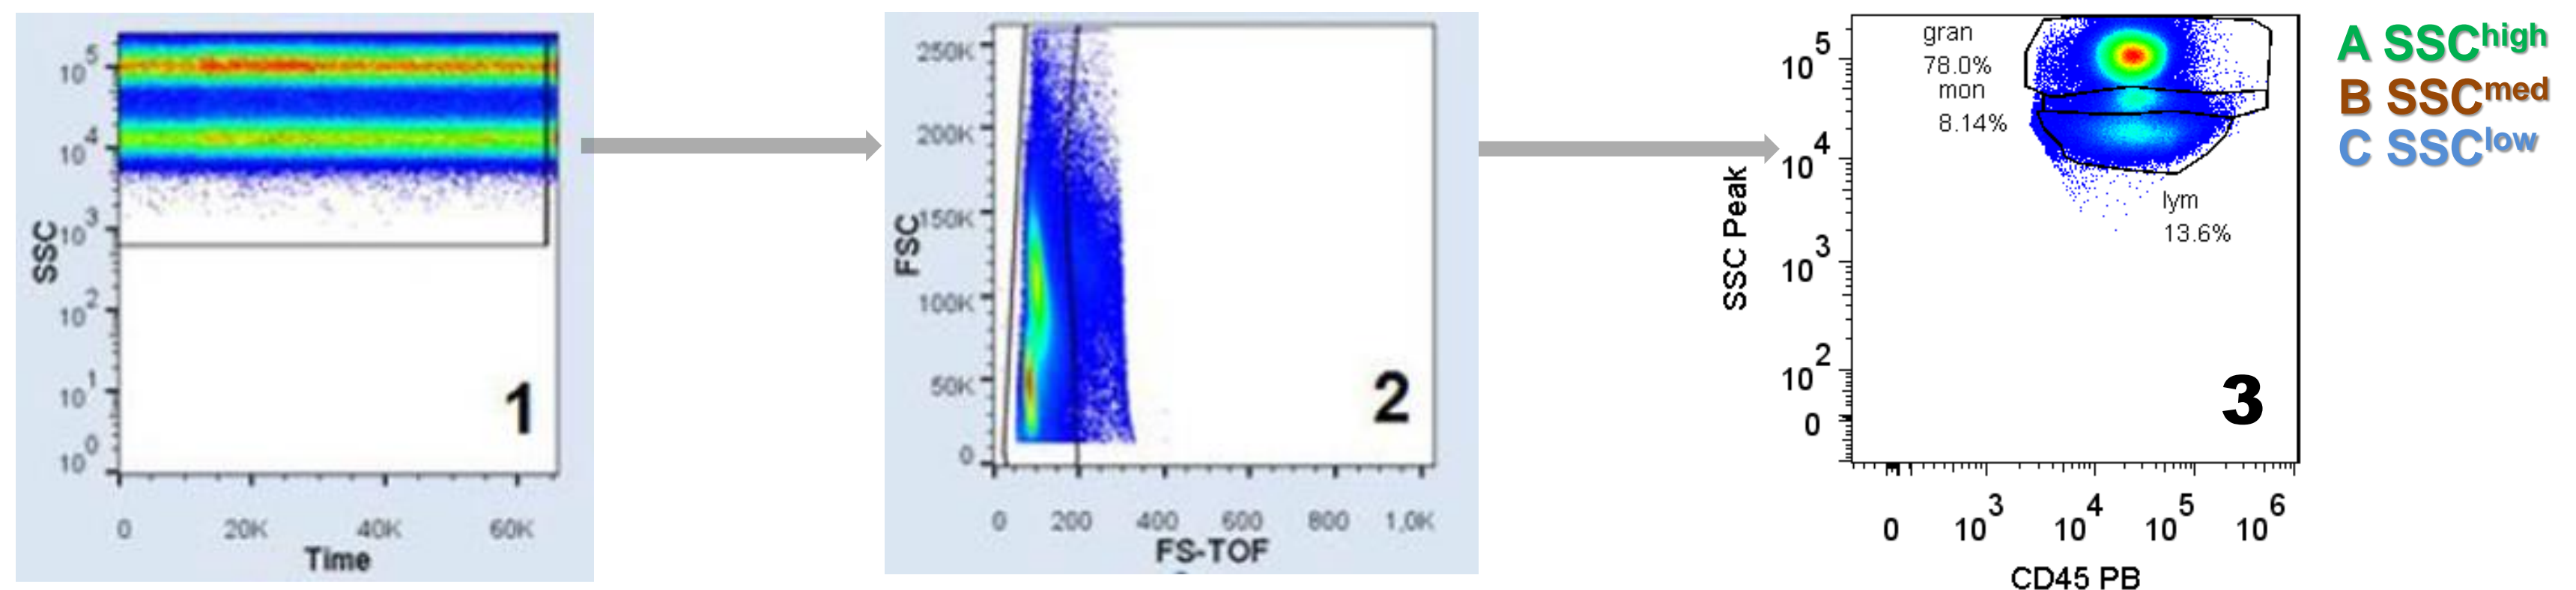

15. Bocsi, J.; Melzer, S.; Dähnert, I.; Tárnok, A. OMIP-023: 10-color, 13 antibody panel for in-depth phenotyping of human peripheral blood leukocytes. *Cytometry A* 2014, 85, 781–784, doi: 10.1002/cyto.a.22505.

16. Melzer, S.; Zachariae, S.; Bocsi, J.; Engel, C.; Löffler, M.; Tárnok, A. Reference intervals for leukocyte subsets in adults: Results from a population-based study using 10-color flow cytometry. *Cytometry B Clin Cytom* 2015, 88, 270–281, doi: 10.1002/cyto.b.21234.

**Figure S2. Gating strategy for the 10-color 13-antibody panel OMIP-023** using a sample of one subject. After excluding air bubbles and non-single events (plots 1 and 2 in Figure S1), CD45<sup>+</sup> leukocytes were gated according to SSC height to analyze granulocytes SSC<sup>high</sup>; plot 2), monocytes (SSC<sup>med</sup>; plots 3 to 5), and lymphocytes (SSC<sup>low</sup>; plots 6 to 11). Further details can be found in *Methods\** and in [15] and [16].

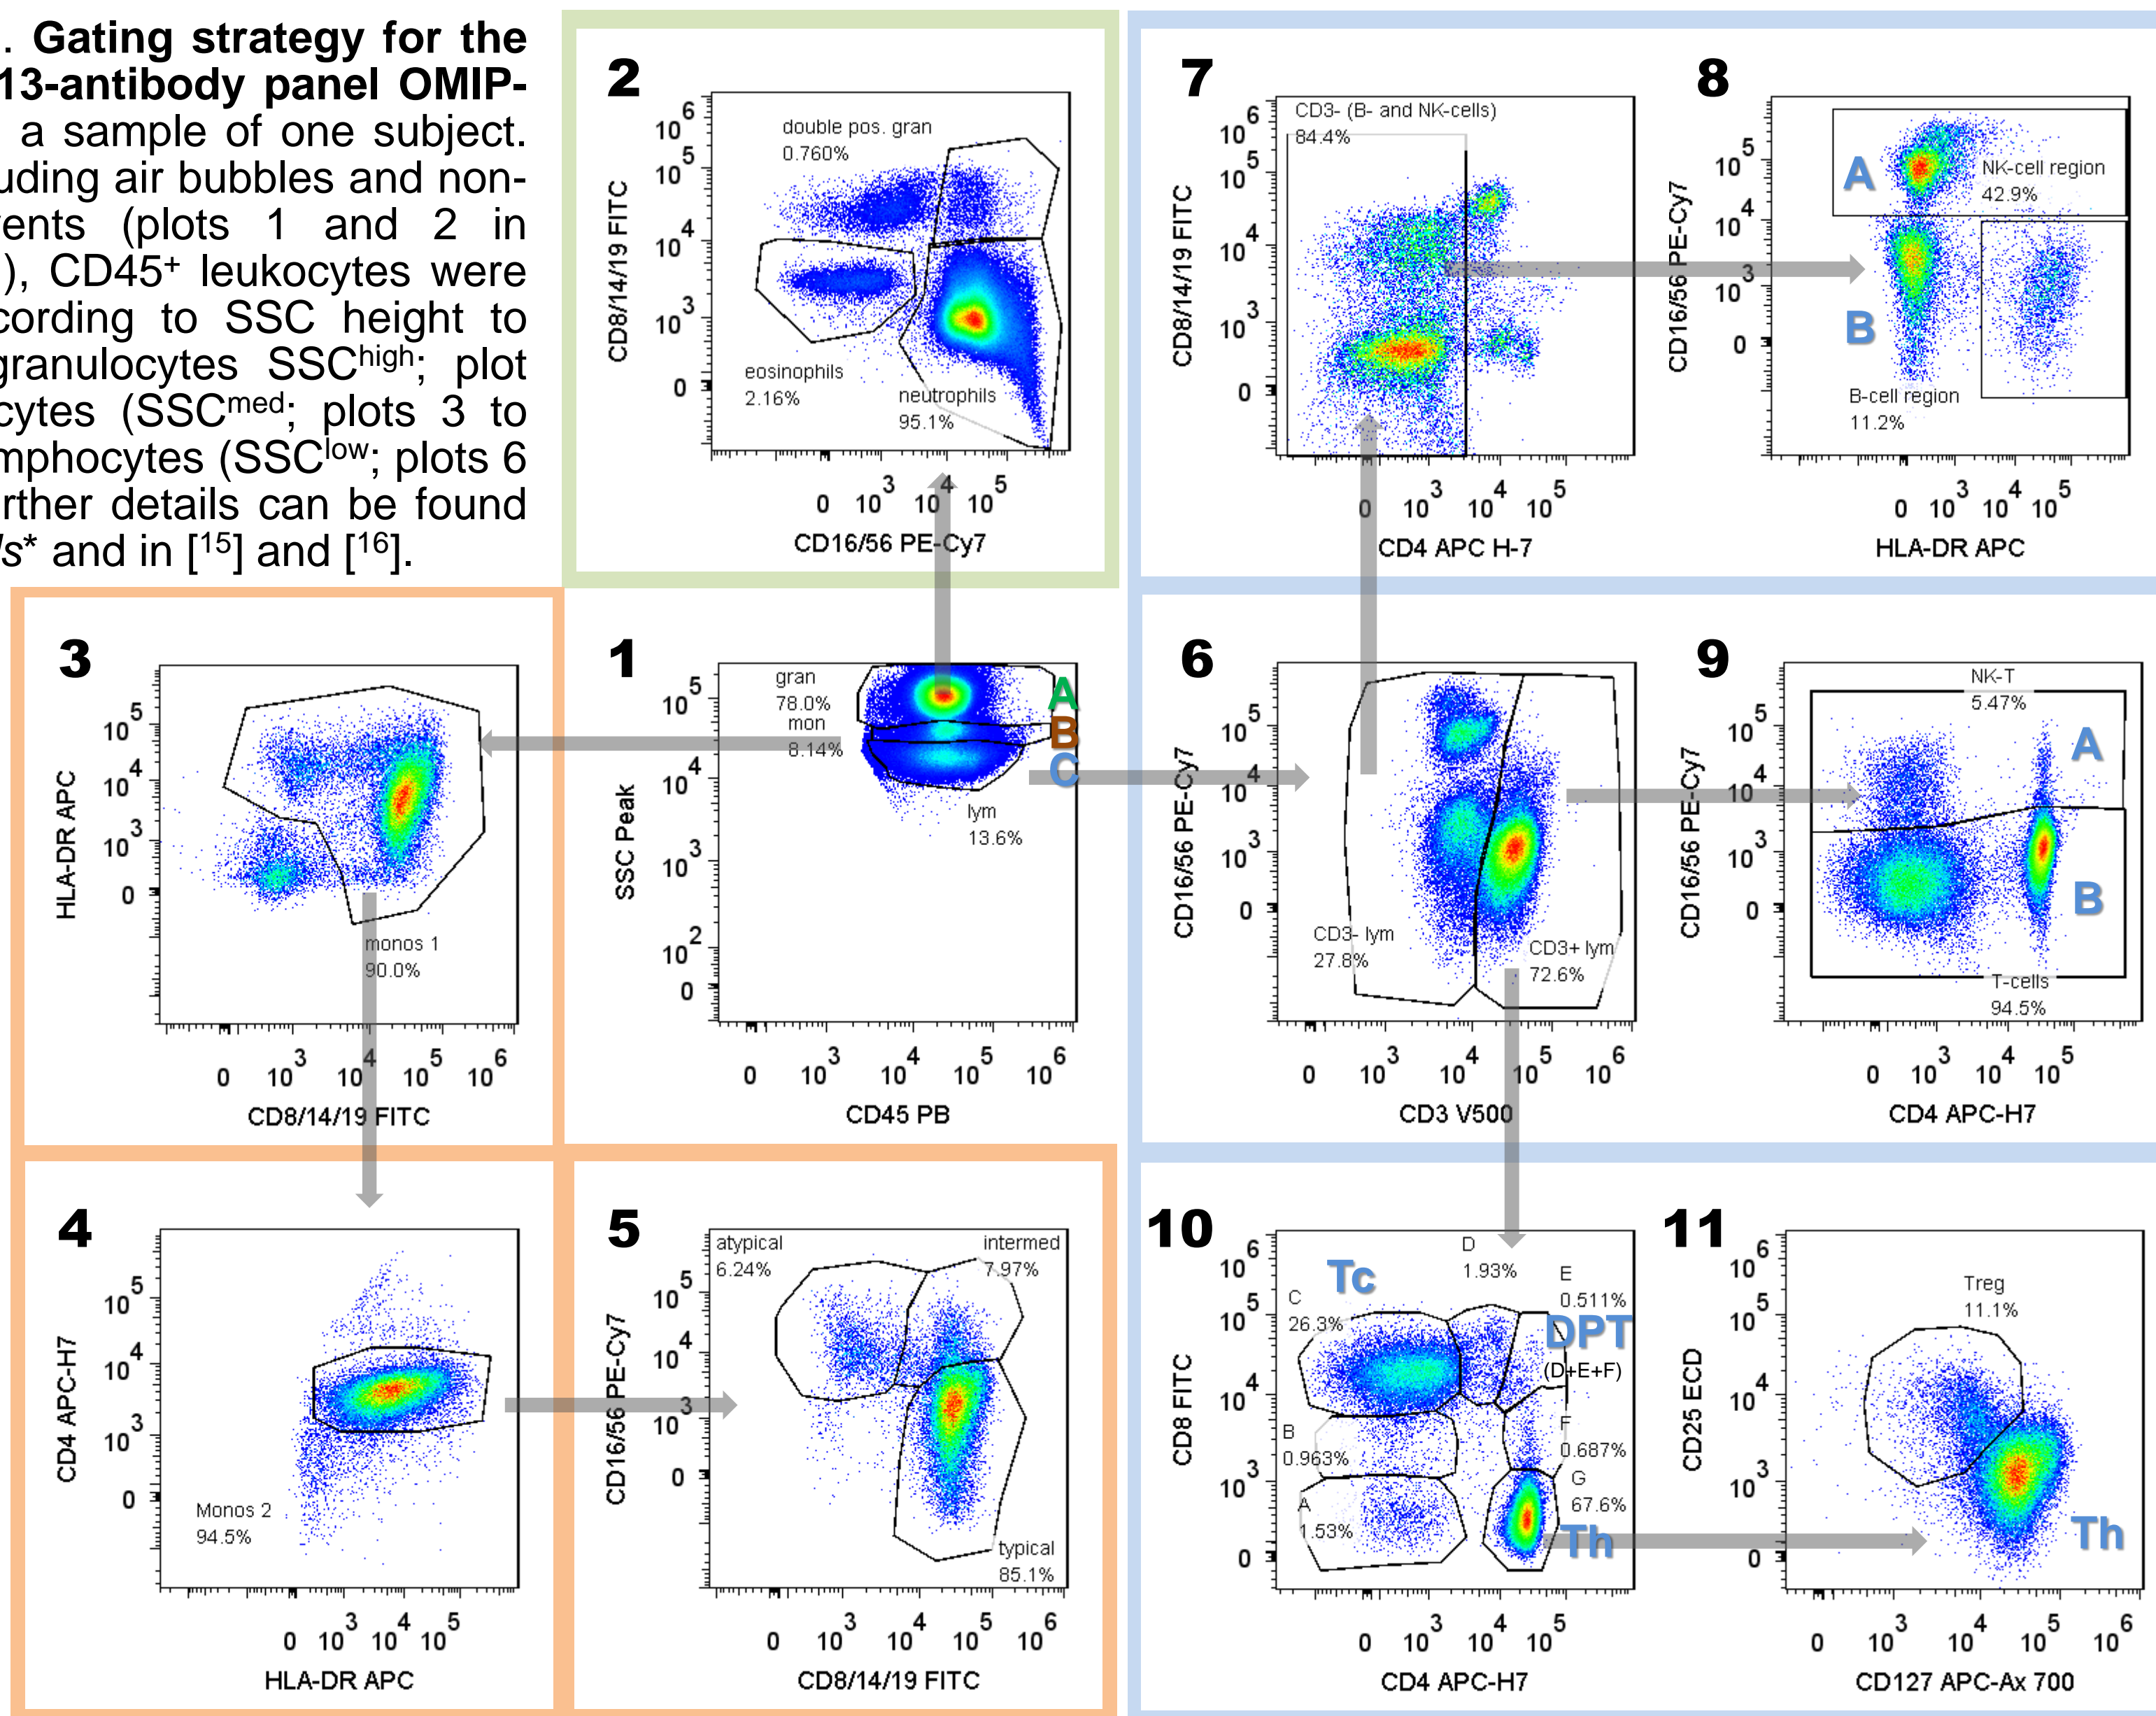

\* According to SSC height, gates of granulocytes (plot 1 A: CD45<sup>+</sup>SSC<sup>high</sup>), monocytes (B: CD45<sup>+</sup>SSC<sup>med</sup>) and lymphocytes (C: CD45<sup>+</sup>SSC<sup>low</sup>) were discriminated and further subdivided. Neutrophils (plot 2: CD16<sup>+</sup>) and eosinophils (plot 2: CD16<sup>-</sup>) in granulocytes were discriminated. After excluding CD14<sup>-</sup>HLA-DR<sup>-</sup> events (plot 3) and CD4<sup>-</sup> events (plot 4) from monocyte analysis, classical (typical) monocytes (plot 5: CD14<sup>++</sup>CD16<sup>+</sup>) and nonclassical monocytes (plot 5: atypical [CD14<sup>dim</sup>CD16<sup>++</sup>] and intermediate [CD14<sup>+</sup>CD16<sup>++</sup>]) were discriminated as well. Lymphocytes (plot 6) were gated into CD3<sup>-</sup> (left; after exclusion of CD4<sup>+</sup> events [plot 7] further analyzed in plot 8A: CD16/56<sup>+</sup> NK cells; plot 8B: CD16/56<sup>-</sup> B-lymphocytes) and CD3<sup>+</sup> events (right; further analyzed in 9A: CD3<sup>+</sup>CD16/56<sup>+</sup> NKT cells and 9B: CD3<sup>+</sup>CD16/56<sup>-</sup> T-lymphocytes). Three T-lymphocyte subsets were differentiated (plot 10): CD8<sup>high</sup> cytotoxic T cells (Tc), CD4<sup>+</sup> T-helper cells (Th) and CD4<sup>+</sup>CD8<sup>+</sup> double positive T-cells (DPT). The gated T-helper cells were also used to identify CD25<sup>+</sup> regulatory T-cells (Treg: anti-CD127 *versus* anti-CD25, plot 11). Further details in [15] and [16].
